# Supplementary material for: Chiral acid selectivity displayed by PEDOT electropolymerised in the presence of chiral molecules
Source: Royal Society of Chemistry journal article supplement (doi:10.1039/c2an15854j), 2012-01-01
Supplement: c2an15854j.pdf [file c2an15854j.pdf]

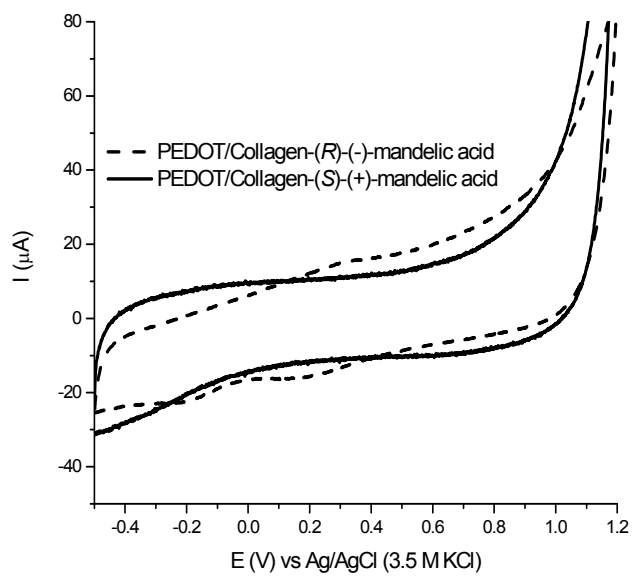

Fig. 1: Cyclic voltammograms of PEDOT/collagen in 100 mM  $\text{KCl}$  containing 1 mM (*R*)-(-)-mandelic acid (dashed line) and 1 mM (*S*)-(+)-mandelic acid (solid line).
